# Supplementary material for: Combined inactivation of the Clostridium cellulolyticum lactate and malate dehydrogenase genes substantially increases ethanol yield from cellulose and switchgrass fermentations
Source: Springer Nature journal article supplement (doi:10.1186/1754-6834-5-2), 2012-01-04
Supplement: Additional file 7 [file 1754-6834-5-2-s7.pdf]

## Oligonucleotide primers used for targeted mutagenesis

| Primer name    | Sequence <sup>1</sup>                                                           | Function                                                                             |
|----------------|---------------------------------------------------------------------------------|--------------------------------------------------------------------------------------|
| pJIR750aiXmalF | CAAAACCCGGGATAATTATCCTTACCAGCC<br>CATAGGGTGCGCCAGATAGG <sup>1</sup>             | Forward primer to clone intron+ltrA from pJIR750ai                                   |
| pJIR750aiXhoIR | CAAAACTCGAGCGGGTGCTCGACATTCAC<br>TGTGTTTATGAATCACGTGAC                          | Reverse primer to clone intron+ltrA from pJIR750ai                                   |
| EBSu           | CGAAATTAGAACTTGCCTCAGTAAAC                                                      | EBS universal primer for cross-over PCR                                              |
| Mdh217sIBS     | AAAACCCGGGATAATTATCCTTAGATTGCG<br>ATGTTGTGCGCCAGATAGGGTG                        | IBS primer for cross-over PCR to retarget <i>Ccel_0137</i>                           |
| Mdh217sEBS1d   | CAGATTGTACA <sup>1</sup> AAATGTGGTGATAACAGATA<br>AGTCGATGTTATTAACCTACCTTTCTTTGT | EBS1d primer for cross-over PCR to retarget <i>Ccel_0137</i>                         |
| Mdh217sEBS2    | TGAACGCAAGTTTCTAATTTTCGATTCAATC<br>TCGATAGAGGAAAGTGTCT                          | EBS2 primer for cross-over PCR to retarget <i>Ccel_0137</i>                          |
| Ldh517sIBS     | AAAACCCGGGATAATTATCCTTAAACGTCC<br>ATGCTGTGCGCCAGATAGGGTG                        | IBS primer for cross-over PCR to retarget <i>Ccel_2485</i>                           |
| Ldh517sEBS1d   | CAGATTGTACA <sup>1</sup> AAATGTGGTGATAACAGATA<br>AGTCCATGCTTATAACTACCTTTCTTTGT  | EBS1d primer for cross-over PCR to retarget <i>Ccel_2485</i>                         |
| Ldh517sEBS2    | TGAACGCAAGTTTCTAATTTTCGGTTACGTT<br>CCGATAGAGGAAAGTGTCT                          | EBS2 primer for cross-over PCR to retarget <i>Ccel_2485</i>                          |
| MdhF           | GGGATTTTAATGGGTTTTAAAGTTG                                                       | Forward primer to screen <i>Ccel_0137</i> mutant and sequence                        |
| MdhR           | TCCAGGTGAATAAGCTAAAGAAAGA                                                       | Reverse primer to screen <i>Ccel_0137</i> mutant and sequence                        |
| LdhF           | TATACTTTTGCACCCAGAATGTTTT                                                       | Forward primer to screen <i>Ccel_2485</i> mutant and sequence                        |
| LdhR           | TGACTGTACGGGTTTTATCAATTT                                                        | Reverse primer to screen <i>Ccel_2485</i> mutant and sequence                        |
| pWH199F2       | ATAAGTTATGGTTGGAATTGTGAGC                                                       | pWH199 plasmid specific primer to screen and sequence                                |
| pintronF1      | CCTATGGGAACGAAACGAAA                                                            | Intron-specific primer to screen and sequence                                        |
| pintronR1      | CGAGTACTCCGTACCCTTGC                                                            | Intron-specific primer to screen and sequence                                        |
| Pta370sIBS     | AAAACCCGGGATAATTATCCTTAATGGTCC<br>CAGAGTGCGCCAGATAGGGTG                         | IBS primer for cross-over PCR to retarget <i>Ccel_2137</i> , sense orientation       |
| Pta370sEBS1d   | CAGATTGTACA <sup>1</sup> AAATGTGGTGATAACAGATA<br>AGTCGCAGGAGCTAACTTACCTTTCTTTGT | EBS1d primer for cross-over PCR to retarget <i>Ccel_2137</i> , sense orientation     |
| Pta370sEBS2    | TGAACGCAAGTTTCTAATTTTCGGTTACCAT<br>CCGATAGAGGAAAGTGTCT                          | EBS2 primer for cross-over PCR to retarget <i>Ccel_2137</i> , sense orientation      |
| Pta695aIBS     | AAAACCCGGGATAATTATCCTTACTGGACC<br>TTTTTGTGCGCCAGATAGGGTG                        | IBS primer for cross-over PCR to retarget <i>Ccel_2137</i> , antisense orientation   |
| Pta695aEBS1d   | CAGATTGTACA <sup>1</sup> AAATGTGGTGATAACAGATA<br>AGTCCTTTTCTAACTTACCTTTCTTTGT   | EBS1d primer for cross-over PCR to retarget <i>Ccel_2137</i> , antisense orientation |
| Pta695aEBS2    | TGAACGCAAGTTTCTAATTTTCGGTTCCAG<br>TCGATAGAGGAAAGTGTCT                           | EBS2 primer for cross-over PCR to retarget <i>Ccel_2137</i> , antisense orientation  |
| Pta701aIBS     | AAAACCCGGGATAATTATCCTTAGAAGACC<br>TGGAGGTGCGCCAGATAGGGTG                        | IBS primer for cross-over PCR to retarget <i>Ccel_2137</i> , antisense orientation   |
| Pta701aEBS1d   | CAGATTGTACA <sup>1</sup> AAATGTGGTGATAACAGATA<br>AGTCCTGGAGCTTAACTTACCTTTCTTTGT | EBS1d primer for cross-over PCR to retarget <i>Ccel_2137</i> , antisense orientation |
| Pta701aEBS2    | TGAACGCAAGTTTCTAATTTTCGATTCTTCT<br>CGATAGAGGAAAGTGTCT                           | EBS2 primer for cross-over PCR to retarget <i>Ccel_2137</i> , antisense orientation  |
| Pta426aIBS     | AAAACCCGGGATAATTATCCTTATTTGCC<br>CGGGAGTGCGCCAGATAGGGTG                         | IBS primer for cross-over PCR to retarget <i>Ccel_2137</i> , antisense orientation   |
| Pta426aEBS1d   | CAGATTGTACA <sup>1</sup> AAATGTGGTGATAACAGATA<br>AGTCCCGGAGCTAACTTACCTTTCTTTGT  | EBS1d primer for cross-over PCR to retarget <i>Ccel_2137</i> , antisense orientation |
| Pta426aEBS2    | TGAACGCAAGTTTCTAATTTTCGGTTGCAAA<br>TCGATAGAGGAAAGTGTCT                          | EBS2 primer for cross-over PCR to retarget <i>Ccel_2137</i> , antisense orientation  |
| Ack436sIBS     | AAAACCCGGGATAATTATCCTTACCTATCG<br>TAGCTGTGCGCCAGATAGGGTG                        | IBS primer for cross-over PCR to retarget <i>Ccel_2136</i> , sense orientation       |
| Ack436sEBS1d   | CAGATTGTACA <sup>1</sup> AAATGTGGTGATAACAGATA<br>AGTCGTAGCTGTTAACTTACCTTTCTTTGT | EBS1d primer for cross-over PCR to retarget <i>Ccel_2136</i> , sense orientation     |
| Ack436sEBS2    | TGAACGCAAGTTTCTAATTTTCGGTTATAGG<br>TCGATAGAGGAAAGTGTCT                          | EBS2 primer for cross-over PCR to retarget <i>Ccel_2136</i> , sense orientation      |
| PtaF1          | TATAACAGTTTCAACGGTTTGTGAA                                                       | Forward primer to screen <i>Ccel_2137</i> mutant and sequence                        |
| PtaR1          | AACTCCCGCATTTATACTAAAC                                                          | Reverse primer to screen <i>Ccel_2137</i> mutant and sequence                        |
| PtaF2          | CTTCTGAAAGTAACGATATCAGAA                                                        | Forward primer to screen <i>Ccel_2137</i> mutant and sequence                        |
| PtaR2          | TACAGCCTTTGAAAGGTACATTAAC                                                       | Reverse primer to screen <i>Ccel_2137</i> mutant and sequence                        |
| AckF           | GTTTTAGTTATAAATGCGGGGAGTT                                                       | Forward primer to screen <i>Ccel_2136</i> mutant and sequence                        |
| AckR           | TGTTAACAGCACAAATACTTGAACC                                                       | Reverse primer to screen <i>Ccel_2136</i> mutant and sequence                        |

<sup>1</sup> Restriction enzyme sites in primers are underlined.
